# Supplementary material for: A thermodynamic insight into the recognition of hydrophilic and hydrophobic amino acids in pure water by aza-scorpiand type receptors
Source: Royal Society of Chemistry journal article supplement (doi:10.1039/c4ob02092h), 2014-10-30

## Supporting Information

### **A Thermodynamic Insight into the Recognition of Hydrophilic and Hydrophobic Amino Acids in Pure Water by Aza-scorpiand Type Receptors**

**Salvador Blasco, Begoña Verdejo, Carla Bazzicalupi, Antonio Bianchi,  
Claudia Giorgi, Concepción Soriano, Enrique García-España.**

- **Table S1** Thermodynamic data for the formation of amino acid complexes with **L1** in 0.15 M NaClO<sub>4</sub> at 298.1 K.
- **Table S2** Stepwise stability constants for the formation of selected amino acid complexes with **L2** in 0.15 M NaClO<sub>4</sub> at 298.1 K.
- **Table S3** Thermodynamic data for the protonation of amino acids in 0.15 M NaClO<sub>4</sub>, 298.1 K
- **Fig. S1.** Aromatic zone <sup>1</sup>H NMR spectra of solutions containing **L2** and Glu in 1:4 molar ratio recorded in D<sub>2</sub>O at pD = 4.5 (a) and pD = 7.3 (b)
- **Fig. S2** Minimum energy structures calculated for the complexes [HL1(Asp)]<sup>-</sup> (a), [HL1(HAsp)] (b), [H<sub>2</sub>L1(HAsp)]<sup>+</sup> (c), [H<sub>3</sub>L1(HAsp)]<sup>2+</sup> (d), [H<sub>3</sub>L1(H<sub>2</sub>Asp)]<sup>3+</sup> (e).
- **Fig. S3.** Minimum energy structures calculated for the complexes [HL1(HAla)]<sup>+</sup> (a), [H<sub>2</sub>L1(HAla)]<sup>2+</sup> (b), [H<sub>3</sub>L(HAla)]<sup>3+</sup> (c).
- **Fig.S4.** Minimum energy structures calculated for the complexes [HL1(Trp)] (a), [HL1(HTrp)]<sup>+</sup> (b), [H<sub>2</sub>L1(HTrp)]<sup>2+</sup> (c), [H<sub>3</sub>L1(HTrp)]<sup>3+</sup> (d).
- **Fig. S5.** Minimum energy structures calculated for the complexes [HL1(His)] (a), [H<sub>2</sub>L1(His)]<sup>+</sup> (b), [H<sub>2</sub>L1(HHis)]<sup>2+</sup> (c), [H<sub>3</sub>L1(HHis)]<sup>3+</sup> (d), [H<sub>3</sub>L1(H<sub>2</sub>His)]<sup>4+</sup> (e).
- **Fig. S6.** Minimum energy structures calculated for the complexes [HL1(Phe)] (a), [H<sub>2</sub>L1(Phe)]<sup>+</sup> (b), H<sub>2</sub>L1(HPhe)]<sup>2+</sup> (c), [H<sub>3</sub>L1(HPhe)]<sup>3+</sup> (d).

- **Fig. S7.** Minimum energy structures calculated for the complexes  $[\mathbf{L2}(\text{Ala})]^-$  (a),  $[\mathbf{HL2}(\text{Ala})]$  (b),  $[\mathbf{L2}(\text{HAla})]$  (c),  $[\mathbf{HL2}(\text{HAla})]^+$  (d),  $[\mathbf{H2L2}(\text{HAla})]^{2+}$  (e).

**Table S1** Thermodynamic data for the formation of amino acid complexes with **L1** in 0.15 M NaClO<sub>4</sub> at 298.1 K.

| Reaction                                                                                                                                   | log <i>K</i>         | $\Delta H^\circ$ (kcal/mol) | $T\Delta S^\circ$ (kcal/mol) |
|--------------------------------------------------------------------------------------------------------------------------------------------|----------------------|-----------------------------|------------------------------|
| HL <sup>+</sup> + HAla $\rightleftharpoons$ [HL(HAla)] <sup>+</sup>                                                                        | 3.15(4) <sup>a</sup> | -0.1(2)                     | 4.2(2)                       |
| H <sub>2</sub> L <sup>2+</sup> + HAla $\rightleftharpoons$ [H <sub>2</sub> L(HAla)] <sup>2+</sup>                                          | 2.94(5)              | -0.1(2)                     | 3.9(2)                       |
| H <sub>3</sub> L <sup>3+</sup> + HAla $\rightleftharpoons$ [H <sub>3</sub> L(HAla)] <sup>3+</sup>                                          | 3.31(4)              | 0.9(2)                      | 5.4(2)                       |
| HL <sup>+</sup> + Phe <sup>-</sup> $\rightleftharpoons$ [HL(Phe)]                                                                          | 2.81(2)              | 3.8(2)                      | 7.7(2)                       |
| H <sub>2</sub> L <sup>2+</sup> + Phe <sup>-</sup> $\rightleftharpoons$ [H <sub>2</sub> L(Phe)] <sup>+</sup>                                | 3.08(2)              | 3.4(2)                      | 8.0(2)                       |
| H <sub>2</sub> L <sup>2+</sup> + HPhe $\rightleftharpoons$ [H <sub>2</sub> L(HPhe)] <sup>2+</sup>                                          | 2.84(2)              | 2.3(1)                      | 6.2(1)                       |
| H <sub>3</sub> L <sup>3+</sup> + HPhe $\rightleftharpoons$ [H <sub>3</sub> L(HPhe)] <sup>3+</sup>                                          | 2.87(2)              | 3.0(2)                      | 6.9(2)                       |
| HL <sup>+</sup> + Tyr <sup>2-</sup> $\rightleftharpoons$ [HL(Tyr)] <sup>-</sup>                                                            | 3.27(1)              | 9.0(4)                      | 13.5(4)                      |
| HL <sup>+</sup> + HTyr $\rightleftharpoons$ [HL(HTyr)]                                                                                     | 3.61(1)              | 5.0(3)                      | 9.9(3)                       |
| H <sub>2</sub> L <sup>2+</sup> + HTyr $\rightleftharpoons$ [H <sub>2</sub> L(HTyr)] <sup>+</sup>                                           | 3.79(1)              | 7.2(4)                      | 12.3(4)                      |
| H <sub>2</sub> L <sup>2+</sup> + H <sub>2</sub> Tyr $\rightleftharpoons$ [H <sub>2</sub> L(H <sub>2</sub> Tyr)] <sup>2+</sup>              | 3.31(1)              | 6.2(3)                      | 10.7(3)                      |
| H <sub>3</sub> L <sup>3+</sup> + H <sub>2</sub> Tyr $\rightleftharpoons$ [H <sub>3</sub> L(H <sub>2</sub> Tyr)] <sup>3+</sup>              | 3.39(1)              | 7.0(4)                      | 11.6(4)                      |
| HL <sup>+</sup> + Trp <sup>-</sup> $\rightleftharpoons$ [HL(Trp)]                                                                          | 2.83(3)              | 3.8(2)                      | 7.7(2)                       |
| HL <sup>+</sup> + HTrp $\rightleftharpoons$ [HL(HTrp)] <sup>+</sup>                                                                        | 3.30(2)              | 1.1(2)                      | 5.6(2)                       |
| H <sub>2</sub> L <sup>2+</sup> + HTrp $\rightleftharpoons$ [H <sub>2</sub> L(HTrp)] <sup>2+</sup>                                          | 3.22(2)              | 1.5(2)                      | 5.9(2)                       |
| H <sub>3</sub> L <sup>3+</sup> + HTrp $\rightleftharpoons$ [H <sub>3</sub> L(HTrp)] <sup>3+</sup>                                          | 3.42(2)              | 2.1(2)                      | 6.8(2)                       |
| HL <sup>+</sup> + Asp <sup>2-</sup> $\rightleftharpoons$ [HL(Asp)] <sup>-</sup>                                                            | 3.2(1)               | 5.1(2)                      | 9.5(2)                       |
| HL <sup>+</sup> + HAsp <sup>-</sup> $\rightleftharpoons$ [HL(HAsp)]                                                                        | 3.48(6)              | 3.4(2)                      | 8.2(2)                       |
| H <sub>2</sub> L <sup>2+</sup> + HAsp <sup>-</sup> $\rightleftharpoons$ [H <sub>2</sub> L(HAsp)] <sup>+</sup>                              | 3.47(6)              | 4.1(2)                      | 8.9(2)                       |
| H <sub>3</sub> L <sup>3+</sup> + HAsp <sup>-</sup> $\rightleftharpoons$ [H <sub>3</sub> L(HAsp)] <sup>2+</sup>                             | 3.72(6)              | 4.6(2)                      | 8.3(2)                       |
| H <sub>3</sub> L <sup>3+</sup> + H <sub>2</sub> Asp $\rightleftharpoons$ [H <sub>3</sub> L(H <sub>2</sub> Asp)] <sup>3+</sup>              | 4.26(6)              | 4.3(2)                      | 10.2(2)                      |
| HL <sup>+</sup> + Glu <sup>2-</sup> $\rightleftharpoons$ [HL(Glu)] <sup>-</sup>                                                            | 3.27(6)              | 6.0(3)                      | 10.5(3)                      |
| HL <sup>+</sup> + HGlu <sup>-</sup> $\rightleftharpoons$ [HL(HGlu)]                                                                        | 3.66(3)              | 3.1(2)                      | 8.1(2)                       |
| H <sub>2</sub> L <sup>2+</sup> + HGlu <sup>-</sup> $\rightleftharpoons$ [H <sub>2</sub> L(HGlu)] <sup>+</sup>                              | 3.67(4)              | 4.1(2)                      | 9.1(2)                       |
| H <sub>3</sub> L <sup>3+</sup> + HGlu <sup>-</sup> $\rightleftharpoons$ [H <sub>2</sub> L(H <sub>2</sub> Glu)] <sup>2+</sup>               | 3.91(3)              | 4.6(2)                      | 9.9(2)                       |
| H <sub>3</sub> L <sup>3+</sup> + H <sub>2</sub> Glu $\rightleftharpoons$ [H <sub>3</sub> L(H <sub>2</sub> Glu)] <sup>3+</sup>              | 4.42(4)              | 1.1(2)                      | 7.1(2)                       |
| HL <sup>+</sup> + His <sup>-</sup> $\rightleftharpoons$ [HL(His)]                                                                          | 2.97(3)              | -3.0(2)                     | 1.1(2)                       |
| H <sub>2</sub> L <sup>2+</sup> + His <sup>-</sup> $\rightleftharpoons$ [H <sub>2</sub> L(His)] <sup>+</sup>                                | 3.33(2)              | 1.8(1)                      | 5.1(1)                       |
| H <sub>2</sub> L <sup>2+</sup> + HHis $\rightleftharpoons$ [H <sub>2</sub> L(HHis)] <sup>2+</sup>                                          | 3.12(3)              | -1.3(2)                     | 3.0(2)                       |
| H <sub>3</sub> L <sup>3+</sup> + HHis $\rightleftharpoons$ [H <sub>3</sub> L(HHis)] <sup>3+</sup>                                          | 3.38(2)              | -1.1(1)                     | 3.5(1)                       |
| H <sub>3</sub> L <sup>3+</sup> + H <sub>2</sub> His <sup>+</sup> $\rightleftharpoons$ [H <sub>3</sub> L(H <sub>2</sub> His)] <sup>4+</sup> | 3.79(2)              | -5.5(1)                     | -0.3(1)                      |

<sup>a</sup>Numbers in parentheses are standard deviations in the last significant figure

**Table S2** Stepwise stability constants for the formation of selected amino acid complexes with **L2** in 0.15 M NaClO<sub>4</sub> at 298.1 K.

| Reaction                                              | Ala                  | Phe     | Trp     | Tyr     | His     | Asp     | Glu     |
|-------------------------------------------------------|----------------------|---------|---------|---------|---------|---------|---------|
| $L + A^{2-} \rightleftharpoons [LA]^{2-}$             | -                    | -       | -       | 3.11(3) | -       | 4.09(1) | 4.68(2) |
| $L + A^- \rightleftharpoons [LA]^-$                   | 3.11(5) <sup>a</sup> | 2.62(4) | 3.26(3) | -       | 3.46(4) | -       | -       |
| $L + HA^- \rightleftharpoons [L(HA)]^-$               | -                    | -       | -       | 3.25(5) | -       | 4.28(2) | 4.98(2) |
| $HL^+ + A^{2-} \rightleftharpoons [HLA]^-$            | -                    | -       | -       | 3.17(5) | -       | 3.92(2) | 4.44(2) |
| $L + HA \rightleftharpoons [L(HA)]$                   | 3.33(8)              | 3.0(1)  | 3.92(3) | -       | 4.25(4) | -       | -       |
| $HL^+ + A^- \rightleftharpoons [HLA]$                 | 3.05(8)              | 2.0(1)  | 3.20(3) | -       | 3.40(4) | -       | -       |
| $HL^+ + HA^- \rightleftharpoons [HL(HA)]$             | -                    | -       | -       | 3.30(2) | -       | 3.79(1) | 4.38(2) |
| $HL^+ + HA \rightleftharpoons [HL(HA)]^+$             | 3.01(6)              | 2.27(9) | 3.03(4) | -       | 4.06(5) | -       | -       |
| $H_2L^{2+} + HA^- \rightleftharpoons [H_2L(HA)]^+$    | -                    | -       | -       | 3.29(5) | -       | 3.29(2) | 3.83(2) |
| $H_2L^{2+} + HA \rightleftharpoons [H_2L(HA)]^{2+}$   | 2.5(1)               | -       | 2.42(6) | -       | 2.80(6) | -       | -       |
| $H_3L^{3+} + HA^- \rightleftharpoons [H_3L(HA)]^{2+}$ | -                    | -       | -       | -       | -       | 2.38(3) | 2.98(2) |

<sup>a</sup>Numbers in parentheses are standard deviations in the last significant figure

**Table S3** Thermodynamic data for the protonation of amino acids in 0.15 M NaClO<sub>4</sub>, 298.1 K

| <b>Reaction</b>                                                                     | <b>logK</b> | <b>ΔH°<br/>(kcal/mol)</b> | <b>TΔS°<br/>(kcal/mol)</b> |
|-------------------------------------------------------------------------------------|-------------|---------------------------|----------------------------|
| Ala <sup>-</sup> + H <sup>+</sup> ⇌ HAla                                            | 9.73(1)     | -10.2(1)                  | 3.1(1)                     |
| HAla + H <sup>+</sup> ⇌ H <sub>2</sub> Ala <sup>+</sup>                             | 2.48(1)     | 0.0(2)                    | 3.4(2)                     |
|                                                                                     |             |                           |                            |
| Phe <sup>-</sup> + H <sup>+</sup> ⇌ HPhe                                            | 9.08(1)     | -10.28(1)                 | 2.11(3)                    |
| HPhe + H <sup>+</sup> ⇌ H <sub>2</sub> Phe <sup>+</sup>                             | 2.35(1)     | -0.59(6)                  | 2.62(6)                    |
|                                                                                     |             |                           |                            |
| Tyr <sup>2-</sup> + H <sup>+</sup> ⇌ HTyr <sup>-</sup>                              | 9.93(1)     | -7.1(1)                   | 6.4(1)                     |
| HTyr <sup>-</sup> + H <sup>+</sup> ⇌ H <sub>2</sub> Tyr                             | 9.24(1)     | -9.2(1)                   | 3.4(1)                     |
| H <sub>2</sub> Tyr + H <sup>+</sup> ⇌ H <sub>3</sub> Tyr <sup>+</sup>               | 2.48(1)     | -0.2(1)                   | 4.0(1)                     |
|                                                                                     |             |                           |                            |
| Trp <sup>-</sup> + H <sup>+</sup> ⇌ HTrp                                            | 9.27(1)     | -9.8(1)                   | 2.8(3)                     |
| HTrp + H <sup>+</sup> ⇌ H <sub>2</sub> Trp <sup>+</sup>                             | 2.46(1)     | -0.2(6)                   | 3.1(6)                     |
|                                                                                     |             |                           |                            |
| Asp <sup>2-</sup> + H <sup>+</sup> ⇌ HAsp <sup>-</sup>                              | 9.65(1)     | -9.56(7)                  | 3.60(7)                    |
| HAsp <sup>-</sup> + H <sup>+</sup> ⇌ H <sub>2</sub> Asp                             | 3.82(1)     | -1.10(6)                  | 4.11(6)                    |
| H <sub>2</sub> Asp + H <sup>+</sup> ⇌ H <sub>3</sub> Asp <sup>+</sup>               | 1.53(1)     | 1.67(8)                   | 0.42(8)                    |
|                                                                                     |             |                           |                            |
| Glu <sup>2-</sup> + H <sup>+</sup> ⇌ HGlu <sup>-</sup>                              | 9.47 (1)    | -9.07(9)                  | 3.85(9)                    |
| HGlu <sup>-</sup> + H <sup>+</sup> ⇌ H <sub>2</sub> Glu                             | 4.20(1)     | -0.1(1)                   | 5.6(1)                     |
| H <sub>2</sub> Glu + H <sup>+</sup> ⇌ H <sub>3</sub> Glu <sup>+</sup>               | 2.31(1)     | 2.0(2)                    | 5.1(2)                     |
|                                                                                     |             |                           |                            |
| His <sup>-</sup> + H <sup>+</sup> ⇌ HHis                                            | 9.16(1)     | -10.19(6)                 | 2.31(6)                    |
| HHis + H <sup>+</sup> ⇌ H <sub>2</sub> His <sup>+</sup>                             | 6.13(1)     | -6.9(1)                   | 1.4(1)                     |
| H <sub>2</sub> His <sup>+</sup> + H <sup>+</sup> ⇌ H <sub>3</sub> His <sup>2+</sup> | 1.92(1)     | 2.2(2)                    | 4.8(2)                     |

<sup>a</sup>Numbers in parentheses are standard deviations in the last significant figure

**Fig. S1.** Aromatic zone  $^1\text{H}$  NMR spectra of solutions containing **L2** and Glu in 1:4 molar ratio recorded in  $\text{D}_2\text{O}$  at pD = 4.5 (a) and pD = 7.3 (b)

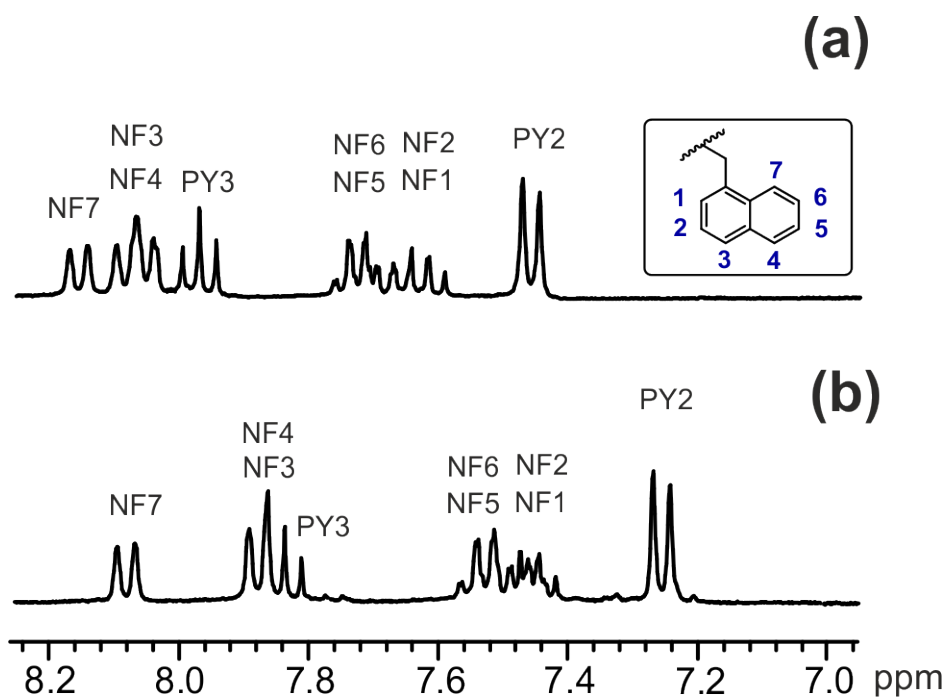

**Fig. S2.** Minimum energy structures calculated for the complexes  $[\text{HL1}(\text{Asp})]^-$  (a),  $[\text{HL1}(\text{HAsp})]$  (b),  $[\text{H}_2\text{L1}(\text{HAsp})]^+$  (c),  $[\text{H}_3\text{L1}(\text{HAsp})]^{2+}$  (d),  $[\text{H}_3\text{L1}(\text{H}_2\text{Asp})]^{3+}$  (e).

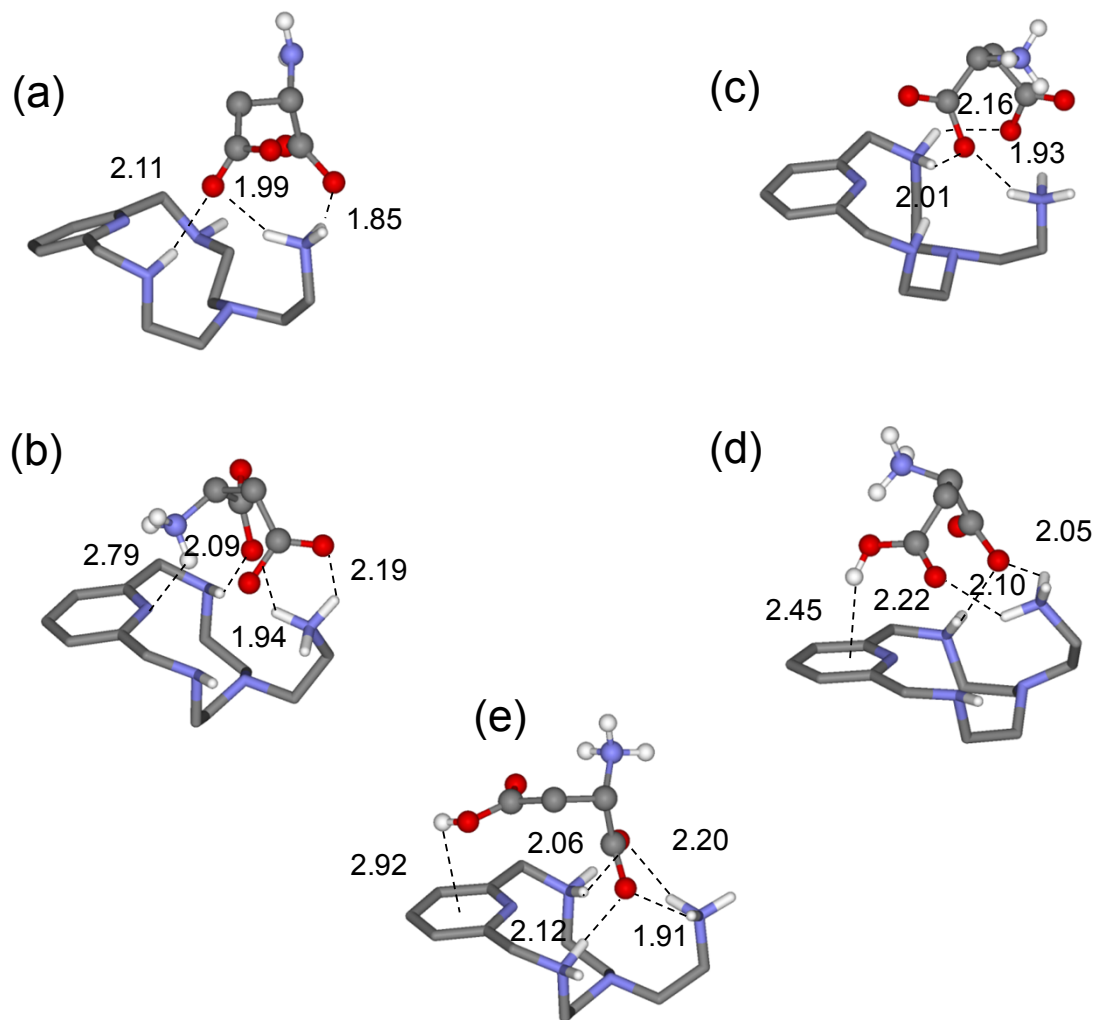

**Fig. S3.** Minimum energy structures calculated for the complexes  $[\text{HL1}(\text{HAla})]^+$  (a),  $[\text{H}_2\text{L1}(\text{HAla})]^{2+}$  (b),  $[\text{H}_3\text{L1}(\text{HAla})]^{3+}$  (c).

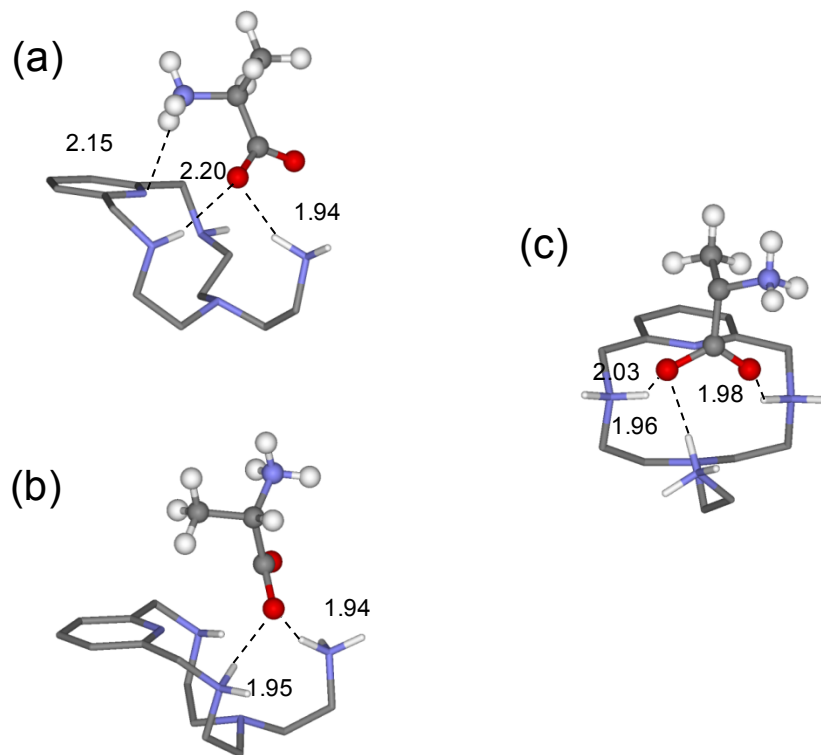



**Fig.S4.** Minimum energy structures calculated for the complexes [HL1(Trp)] (a), [HL1(HTrp)]<sup>+</sup> (b), [H<sub>2</sub>L1(HTrp)]<sup>2+</sup> (c), [H<sub>3</sub>L1(HTrp)]<sup>3+</sup> (d).

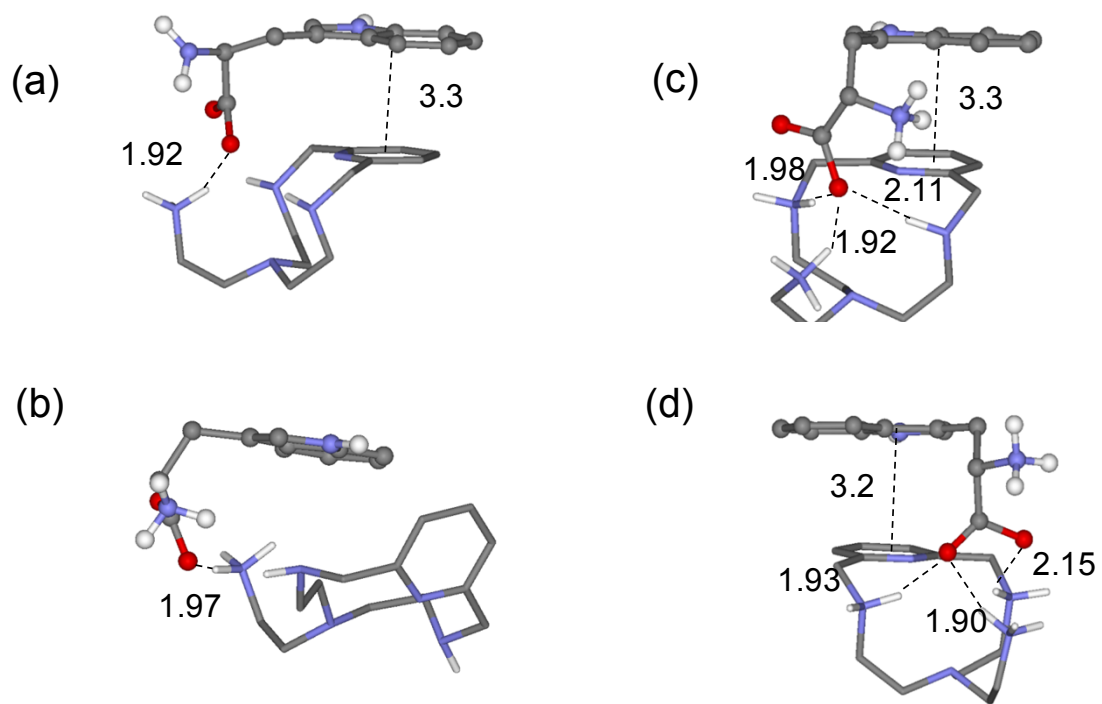

**Fig. S5.** Minimum energy structures calculated for the complexes [HL1(His)] (a), [H<sub>2</sub>L1(His)]<sup>+</sup> (b), [H<sub>2</sub>L1(HHis)]<sup>2+</sup> (c), [H<sub>3</sub>L1(HHis)]<sup>3+</sup> (d), [H<sub>3</sub>L1(H<sub>2</sub>His)]<sup>4+</sup> (e).

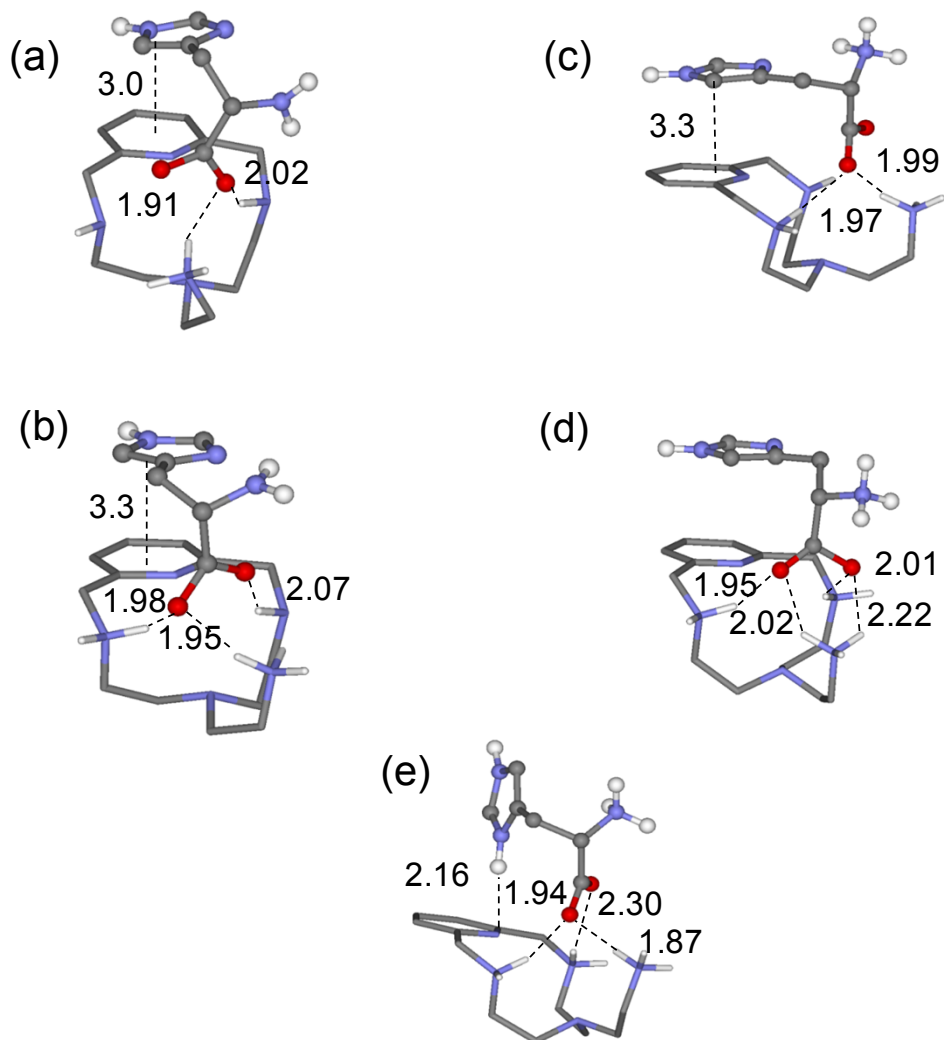

**Fig. S6.** Minimum energy structures calculated for the complexes [HL1(Phe)] (a), [H<sub>2</sub>L1(Phe)]<sup>+</sup> (b), [H<sub>2</sub>L1(HPhe)]<sup>2+</sup> (c), [H<sub>3</sub>L1(HPhe)]<sup>3+</sup> (d).

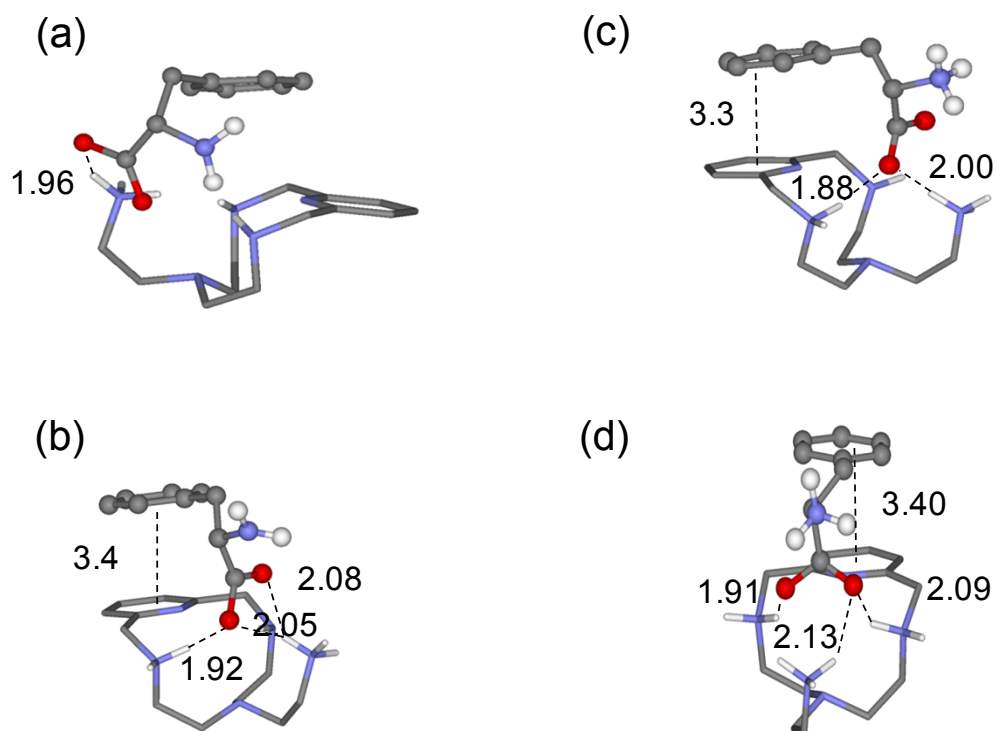

**Fig. S7.** Minimum energy structures calculated for the complexes  $[\text{L2}(\text{Ala})]^-$  (a),  $[\text{HL2}(\text{Ala})]$  (b),  $[\text{L2}(\text{HAla})]$  (c),  $[\text{HL2}(\text{HAla})]^+$  (d),  $[\text{H}_2\text{L2}(\text{HAla})]^{2+}$  (e).

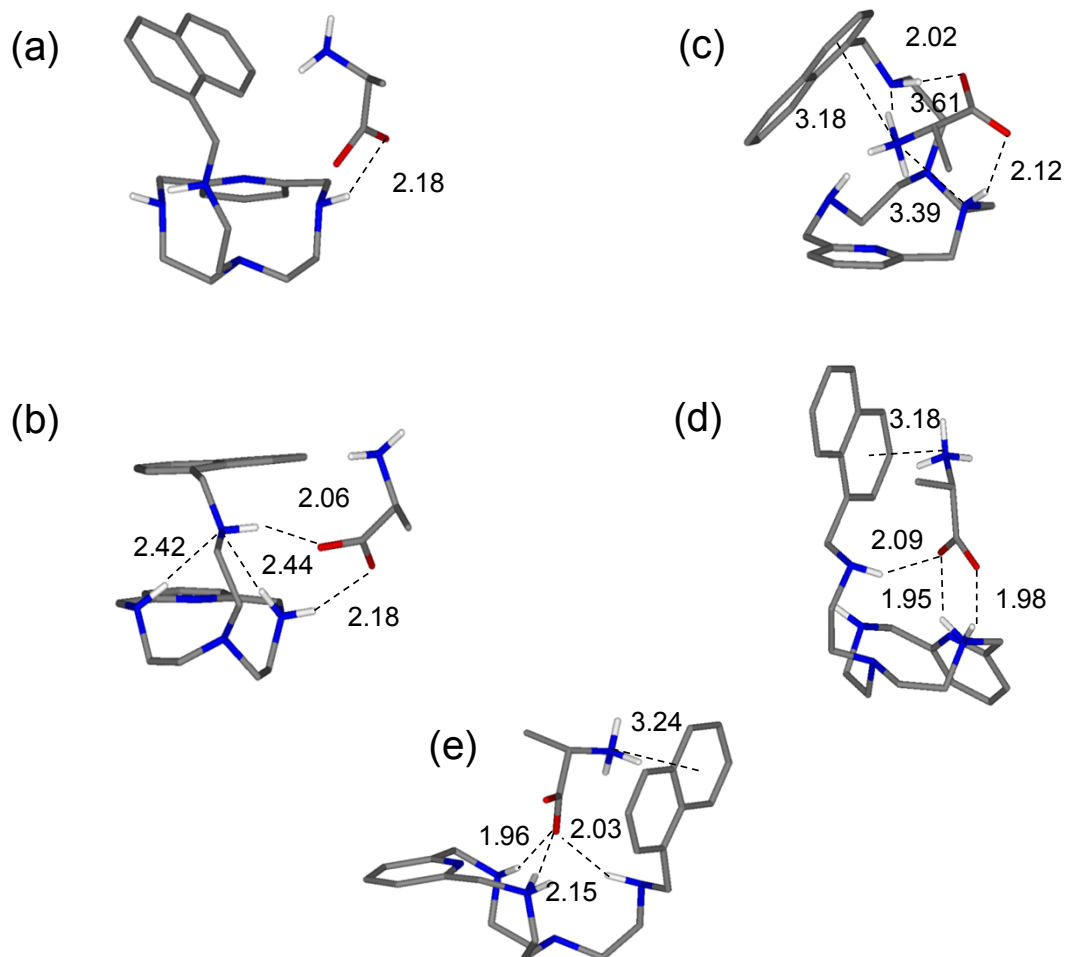

Supplement: c4ob02092h1.pdf [file c4ob02092h1.pdf]
